# Supplementary material for: The thiazide sensitive sodium chloride co-transporter NCC is modulated by site-specific ubiquitylation
Source: PubMed Central journal article supplement (PMC5636807; doi:10.1038/s41598-017-12819-0), 2017-10-11

## Supplementary Information

### **The thiazide sensitive sodium chloride co-transporter NCC is modulated by site-specific ubiquitylation**

Lena L Rosenbaek<sup>1,2,§</sup>, Federica Rizzo<sup>3,4,§</sup>, Qi Wu<sup>1</sup>, Lorena Rojas-Vega<sup>5</sup>, Gerardo Gamba<sup>5</sup>, Nanna MacAulay<sup>2</sup>, Olivier Staub<sup>3,4</sup> and Robert A. Fenton<sup>1</sup>

*<sup>1</sup>InterPrET Center, Department of Biomedicine, Aarhus University, Aarhus DK-8000, Denmark, <sup>2</sup>Center for Neuroscience, University of Copenhagen, Copenhagen, Denmark, <sup>3</sup>Department of Pharmacology, Lausanne University, Lausanne, Switzerland, <sup>4</sup>National Centre of Competence in Research “Kidney.ch”, Switzerland, <sup>5</sup>Molecular Physiology Unit, Instituto de Investigaciones Biomédicas, Universidad Nacional Autónoma de México, Mexico City, Mexico*

**Supplemental Figure 1. Specificity of the NCC immunoprecipitation (IP) using an anti-FLAG antibody.** IP was performed routinely using antibody-deficient samples as negative controls. In IP without antibody, no signal corresponding to NCC can be detected with an anti-NCC antibody. Each lane represents a different sample.

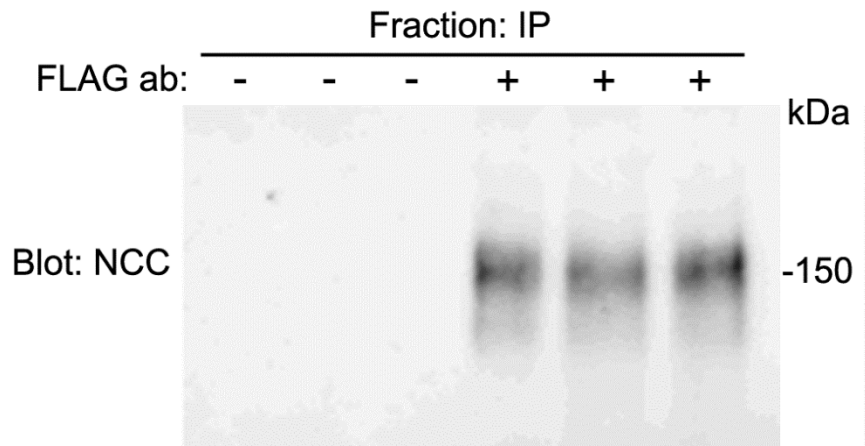

**Supplemental Figure 2. Specificity of the antibody targeting phosphorylated Threonine-58 NCC (pT58).** Various MDCKI-rNCC cell lines with arginine/aspartic acid mutations at T58 (each lane represents a different cell line) were probed with either total NCC or a pT58-NCC specific antibody<sup>9</sup>. Total NCC was observed in all cell lines and whole kidney (WK) but not non-transfected control cells (NT). In contrast, signal using the pT58-NCC antibody was only observed in WK samples. Actin was used as a loading control.

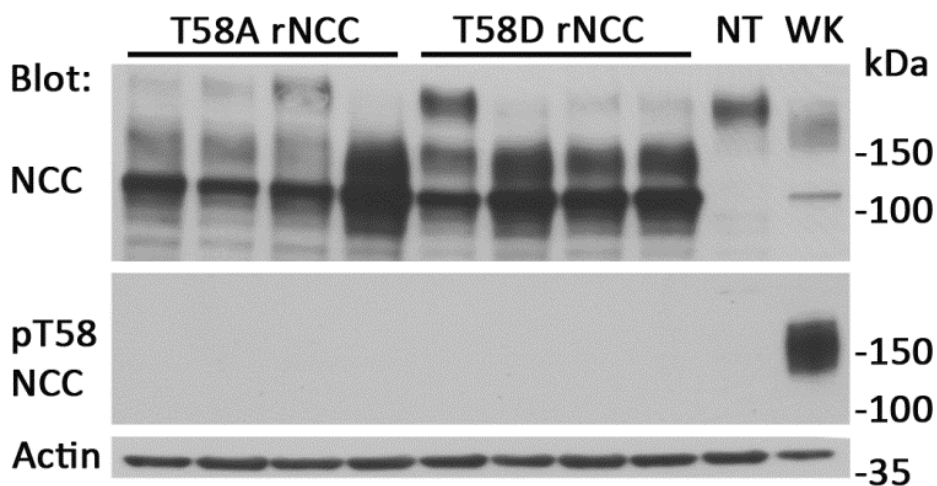

Supplement: 41598_2017_12819_MOESM1_ESM.pdf [file 41598_2017_12819_MOESM1_ESM.pdf]
